# Supplementary material
Source: publisher figshare collection journal article supplement (https://gsajournals.figshare.com/articles/dataset/_/13003589)
Supplement: Supplementary file 1 [file 1]

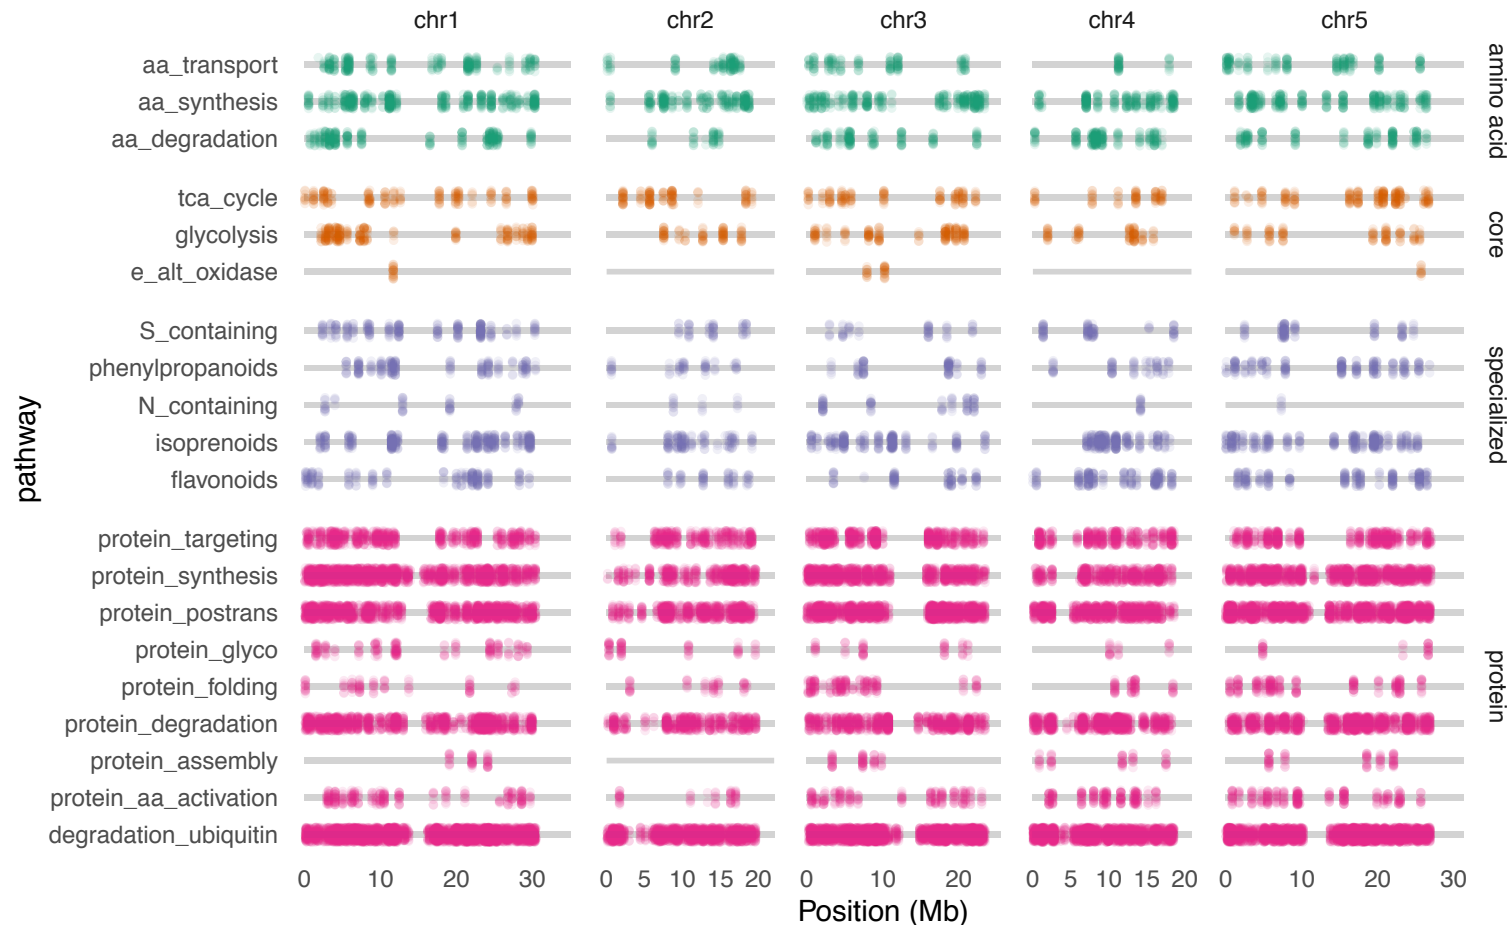

**Figure S3. Genomic locations of pathway SNPs for each pathway.**

The x-axis indicates genomic position on each chromosome in megabases (Mb) and the y-axis indicates each pathway tested, with each point representing a SNP in a given pathway. Points are vertically jittered to better display regions with many SNPs. Pathways are grouped into broad categories of metabolism (amino acid, core, specialized, and protein).
