# Supplementary material
Source: publisher figshare collection journal article supplement (https://gsajournals.figshare.com/articles/dataset/_/13003589)
Supplement: Supplementary file 1 [file 1]

## Sheet: TableS2
Table S2 Arabidopsis thaliana accessions used in this study (from Angelovici et al. Plant Cell 2013)
Ecotype ID	ABRC stock name	Accession number
1	ALL1-2	CS76089
2	ALL1-3	CS76090
23	CAM-16	CS76107
66	CAM-61	CS76108
81	CUR-3	CS76115
91	JEA	CS76148
94	LAC-3	CS76157
96	LAC-5	CS76158
116	LDV-25	CS76161
126	LDV-34	CS76162
149	LDV-58	CS76163
166	MIB-15	CS76181
173	MIB-22	CS76182
178	MIB-28	CS76183
223	MIB-84	CS76184
242	MOG-37	CS76189
258	PAR-3	CS76205
259	PAR-4	CS76206
267	ROM-1	CS76221
281	TOU-A1-115	CS76252
282	TOU-A1-116	CS76253
321	TOU-A1-43	CS76255
328	TOU-A1-62	CS76256
334	TOU-A1-67	CS76257
357	TOU-A1-96	CS76258
362	TOU-C-3	CS76259
366	TOU-E-11	CS76260
373	TOU-H-12	CS76261
374	TOU-H-13	CS76262
378	TOU-I-17	CS76263
379	TOU-I-2	CS76264
380	TOU-I-6	CS76265
383	TOU-J-3	CS76266
386	TOU-K-3	CS76267
390	VOU-1	CS76299
392	VOU-2	CS76300
641	LI-OF-095	CS76165
957	Belmonte-4-94	CS76095
1716	KBS-Mac-8	CS76151
1859	MNF-Pot-48	CS76187
1867	MNF-Pot-68	CS76188
1925	MNF-Che-2	CS76185
2057	Map-42	CS76180
2150	Paw-3	CS76208
2187	Pent-1	CS76209
2274	SLSP-30	CS76228
2290	Ste-3	CS76232
4802	UKSW06-202	CS76292
5056	UKSE06-192	CS76281
5116	UKSE06-272	CS76282
5122	UKSE06-278	CS76283
5158	UKSE06-349	CS76284
5160	UKSE06-351	CS76285
5202	UKSE06-414	CS76286
5207	UKSE06-429	CS76287
5232	UKSE06-466	CS76288
5245	UKSE06-482	CS76289
5264	UKSE06-520	CS76290
5341	UKSE06-628	CS76291
5380	UKNW06-059	CS76275
5381	UKNW06-060	CS76276
5565	UKNW06-386	CS76277
5606	UKNW06-436	CS76278
5742	UKID37	CS76272
5753	UKID48	CS76273
5785	UKID80	CS76274
5805	UKID101	CS76270
5832	App1-16	CS76092
5837	Bor-1	CS76099
5887	DraIV 1-5	CS76120
5896	DraIV 1-14	CS76119
5987	DraIV 6-16	CS76122
6005	DraIV 6-35	CS76123
6008	Duk	CS76124
6020	Fja 1-5	CS76132
6042	Lom1-1	CS76174
6074	Or-1	CS76201
6094	T1040	CS76233
6100	T1110	CS76236
6188	TDr-1	CS76245
6190	TDr-3	CS76248
6194	TDr-8	CS76249
6243	Tottarp-2	CS76251
6318	UduI 1-34	CS76269
6413	Ull3-4	CS76295
6448	ZdrI 2-24	CS76307
6449	ZdrI 2-25	CS76308
6709	Bg-2	CS76096
6727	CIBC-2	CS28140
6729	CIBC-4	CS28141
6730	CIBC-5	CS28142
6744	CSHL-5	CS28181
6810	KNO-11	CS28407
6847	NFC-20	CS28550
6897	Ag-0	CS76087
6898	An-1	CS76091
6899	Bay-0	CS76094
6903	Bor-4	CS76100
6904	Br-0	CS76101
6905	Bur-0	CS76105
6906	C24	CS76106
6907	CIBC-17	CS76111
6909	Col-0	CS76113
6910	Ct-1	CS76114
6911	Cvi-0	CS76116
6914	Edi-0	CS76126
6916	Est-1	CS76127
6919	Ga-0	CS76133
6921	Got-7	CS76136
6924	HR-5	CS76144
6926	Kin-0	CS76153
6928	Kno-18	CS76154
6932	Ler-1	CS76164
6933	LL-0	CS76172
6936	Lz-0	CS76179
6937	Mrk-0	CS76191
6939	Mt-0	CS76192
6940	Mz-0	CS76193
6942	Nd-1	CS76197
6943	NFA-10	CS76198
6944	NFA-8	CS76199
6946	Oy-0	CS76203
6951	Pu2-23	CS76215
6953	Pu2-24	CS28663
6958	Ra-0	CS76216
6959	Ren-1	CS76218
6961	Se-0	CS76226
6962	Shahdara	CS76227
6967	Sq-8	CS76230
6968	Tamm-2	CS76244
6970	Ts-1	CS76268
6973	Ull2-3	CS76293
6976	Uod-7	CS76296
6977	Van-0	CS76297
6979	Wei-0	CS76301
6980	Ws-0	CS76303
6982	Wt-5	CS76304
6983	Yo-0	CS76305
6985	Zdr-6	CS76306
6988	Alc-0	CS76088
6989	Alst-1	CS28013
6990	Amel-1	CS28014
6992	Ang-0	CS28018
6994	Ann-1	CS28049
6996	An-2	CS28017
6998	Arby-1	CS28051
7000	Aa-0	CS28007
7002	Baa-1	CS28054
7004	Bs-2	CS28097
7008	Benk-1	CS28064
7011	Be-1	CS28063
7014	Ba-1	CS28053
7026	Boot-1	CS28091
7031	Bsch-0	CS28099
7035	Blh-2	CS28090
7062	Ca-0	CS28128
7064	Cnt-1	CS28160
7069	Cha-0	CS28133
7071	Chat-1	CS28135
7075	Cit-0	CS28158
7078	Co-2	CS28163
7080	Co-4	CS28165
7092	Com-1	CS28193
7094	Da-0	CS28200
7098	Di-1	CS28208
7100	Db-0	CS28202
7102	Do-0	CS28210
7105	Dra-2	CS28214
7110	Ede-1	CS28217
7123	Ep-0	CS28236
7126	Es-0	CS28241
7128	Est-0	CS28243
7135	Fr-4	CS28268
7139	Fi-1	CS28252
7141	Ga-2	CS28274
7143	Gel-1	CS28279
7145	Ge-1	CS28277
7147	Gie-0	CS28280
7150	Gu-1	CS28332
7151	Go-0	CS28282
7158	Gr-5	CS28326
7163	Ha-0	CS28336
7165	Hn-0	CS28350
7166	Hey-1	CS28344
7169	Hh-0	CS28345
7178	Jm-1	CS28373
7181	Je-0	CS28364
7186	Kn-0	CS28395
7188	Kelsterbach-2	CS28382
7199	Kl-5	CS28394
7201	Kr-0	CS28419
7205	Krot-2	CS28423
7206	Kro-0	CS28420
7224	Li-3	CS28454
7227	Li-5:2	CS28457
7229	Li-6	CS28459
7231	Li-7	CS28461
7244	Mnz-0	CS28495
7252	Mc-0	CS28490
7255	Mh-0	CS28492
7258	Nw-0	CS28573
7260	Nw-2	CS28575
7263	Nz1	CS28578
7270	Nok-1	CS28568
7275	No-0	CS28564
7277	Ob-1	CS28580
7280	Old-1	CS28583
7282	Or-0	CS28587
7283	Ors-1	CS28848
7284	Ors-2	CS28849
7291	Pa-2	CS28595
7296	Petergof	CS76211
7300	Pla-0	CS28640
7306	Pog-0	CS28650
7307	Pn-0	CS28645
7310	Pr-0	CS28651
7316	Rhen-1	CS28685
7320	Rou-0	CS28692
7330	Sapporo-0	CS28724
7331	Sh-0	CS28734
7333	Sei-0	CS28729
7337	Si-0	CS28739
7340	Sav-0	CS28725
7343	Sp-0	CS28743
7346	Ste-0	CS28750
7351	Ty-0	CS28786
7353	Tha-1	CS28758
7355	Tiv-1	CS28760
7372	Tscha-1	CS28779
7373	Tsu-0	CS28780
7378	Uk-1	CS28787
7379	Uk-2	CS28788
7382	Utrecht	CS28795
7384	Ven-1	CS28800
7390	Wag-3	CS28808
7391	Wag-4	CS28809
7392	Wag-5	CS28810
7394	Wa-1	CS28804
7397	Ws	CS28823
7405	Wc-2	CS28814
7408	Wt-3	CS28833
7411	Wl-0	CS28822
7418	Zu-1	CS28847
7424	Jl-3	CS28369
7430	Nc-1	CS28527
7438	N13	CS76194
7446	N4	CS28510
7449	N7	CS28513
7460	Da(1)-12	CS28201
7472	S96	CS28720
7477	WAR	CS28812
7479	PHW-10	CS28610
7482	PHW-13	CS28613
7483	PHW-14	CS28614
7490	PHW-20	CS28620
7492	PHW-22	CS28622
7496	PHW-26	CS28626
7498	PHW-28	CS28628
7502	PHW-31	CS28631
7504	PHW-33	CS28633
7506	PHW-35	CS28635
7507	PHW-36	CS28636
7508	PHW-37	CS28637
7514	RRS-7	CS28713
7515	RRS-10	CS22689
7518	Omo2-1	CS76200
7520	Lp2-2	CS76176
7521	Lp2-6	CS76177
7522	Mr-0	CS76190
7523	Pna-17	CS76213
7525	Rmx-A180	CS76220
8213	Pro-0	CS76214
8214	Gy-0	CS76139
8215	Fei-0	CS76129
8222	Lis-2	CS76170
8235	Hod	CS76141
8236	HSm	CS76146
8239	Koln	CS76155
8240	Kulturen-1	CS76156
8241	Liarum	CS76166
8256	Ba1-2	CS76093
8264	Bla-1	CS76097
8265	Blh-1	CS76098
8271	Bu-0	CS76103
8274	Can-0	CS76109
8275	Cen-0	CS76110
8296	Gd-1	CS76134
8300	Gr-1	CS76137
8304	Hi-0	CS76140
8306	Hov4-1	CS76142
8307	Hovdala-2	CS76143
8310	Hs-0	CS76145
8311	In-0	CS76147
8314	Ka-0	CS76149
8323	Lc-0	CS76159
8325	Lip-0	CS76168
8326	Lis-1	CS76169
8329	Lm-2	CS76173
8343	Na-1	CS76195
8351	Ost-0	CS76202
8354	Per-1	CS76210
8365	Rak-2	CS76217
8374	Rsch-4	CS76222
8376	Sanna-2	CS76223
8378	Sap-0	CS76224
8387	St-0	CS76231
8389	Ta-0	CS76242
8412	Sav-0	CS76225
8420	Kelsterbach-4	CS76152
8424	Kas-1	CS76150
8430	Lisse	CS76171
8610	11ME1.32	CS76083
8692	328PNA054	CS76085
