# Supplementary material
Source: publisher figshare collection journal article supplement (https://gsajournals.figshare.com/articles/dataset/_/13003589)
Supplement: Supplementary file 2 [file 1]

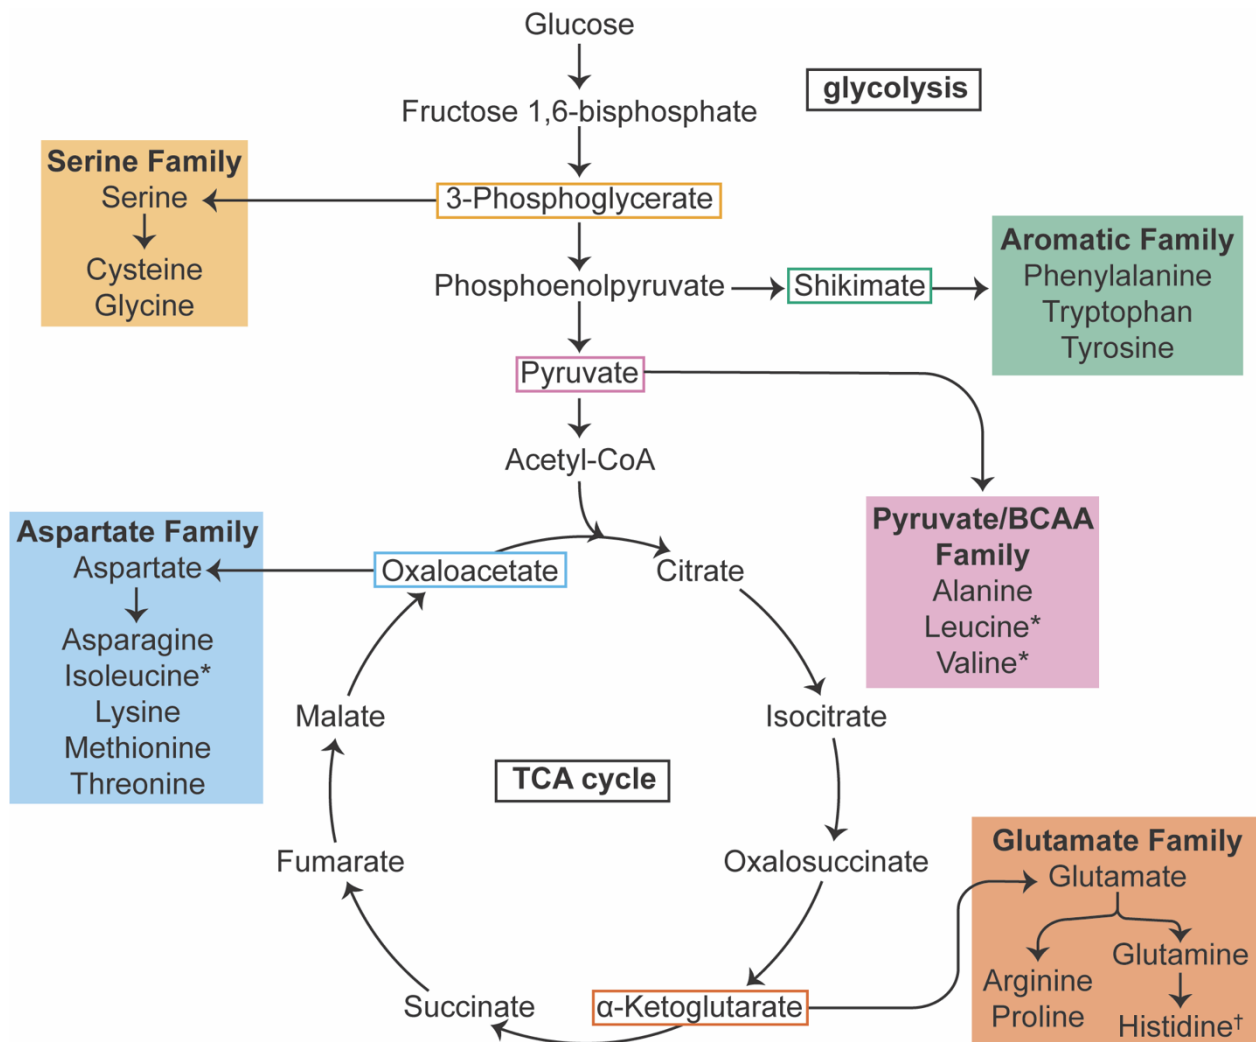

**Figure S1. Biochemical relationships among amino acids.**

Colors indicate different amino acid families and boxes indicate the corresponding precursor. The branched-chain amino acids include Leu, Ile, Val are split across the Aspartate and Pyruvate family and therefore denoted with asterisks (\*). Note that histidine (†) does not belong explicitly to the families identified here, but often is considered as part of the glutamate family.
