# Supplementary material
Source: publisher figshare collection journal article supplement (https://gsajournals.figshare.com/articles/dataset/_/13003589)
Supplement: Supplementary file 3 [file 1]

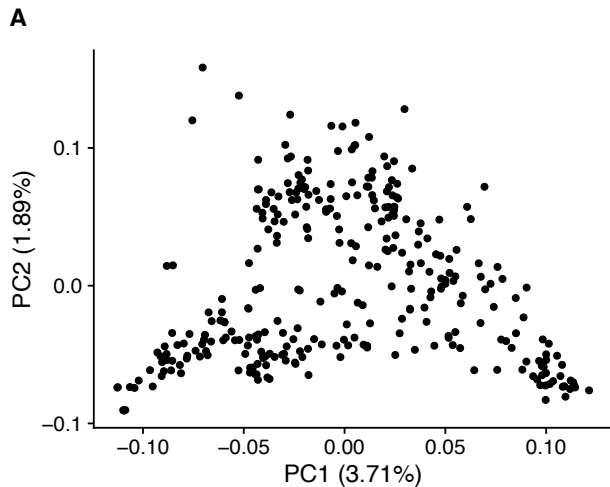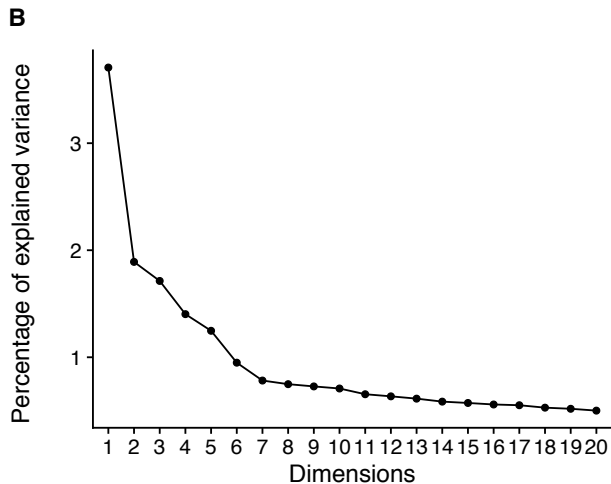

**Figure S2. Principal component analysis (PCA) of genetic data for the 313 *Arabidopsis* accessions used in this study.**

(A) PCA scatterplot and percent variation explained for the first two principal components. (B) Screeplot showing the percent variance explained by each principal component.
